# Supplementary material
Source: publisher figshare collection journal article supplement (https://adisjournals.figshare.com/ndownloader/files/38176485)
Supplement: Supplementary file 1 [file 38176485]

## Ibrutinib: Adis Evaluation

### Key Points

- A small molecule BTK inhibitor that has been developed by Pharmacyclics, Inc. and Janssen Pharmaceutical for the treatment of B-cell malignancies and cGVHD
- Received its pediatric first approval on 29 August 2022 in the USA
- Approved for the treatment of adult and pediatric patients aged 1 year and older with cGVHD after failure of one or more lines of systemic therapy

### Summary

Ibrutinib (IMBRUVICA®), a small molecule inhibitor of Bruton's tyrosine kinase (BTK) developed by Pharmacyclics, Inc. and Janssen Pharmaceutical, is well established as a treatment for B-cell malignancies and is also approved in the USA in adult patients with chronic graft-versus-host disease (cGVHD) and in Japan in adults and adolescents aged  $\geq 12$  years with cGVHD.

Ibrutinib was approved in August 2022 in the USA for use in pediatric patients with cGVHD after failure of one or more lines of systemic therapy and is the first treatment approved for use in this group of patients aged  $< 12$  years (ibrutinib is now indicated for the treatment of adult and pediatric patients aged 1 year and older with cGVHD after failure of one or more lines of systemic therapy).

This summary represents the opinions of the [author/authors]. For a full list of declarations, including funding and author disclosure statements, and copyright information, please see the full text online. © Springer Nature Switzerland AG 2022.
